# Supplementary material for: Filament Dynamics during Simulated Ventricular Fibrillation in a High-Resolution Rabbit Heart
Source: Biomed Res Int. 2015 Oct 26;2015:720575. doi: 10.1155/2015/720575 (PMC4637469; doi:10.1155/2015/720575)
Supplement: Supplementary file 1 — The first movie (apex_RV_filament.mp4) focuses on the apical portion of the heart (anterior view). The mesh is translucent so that the endocardial surface and transmural vessels can be seen. The movie shows filament behaviour in this region from t=200ms to t=500ms. A small stable filament at the bottom of the right ventricle can be seen, and compared to more dynamic filaments in the left ventricle. This movie corresponds to Figure 6 in the paper The second movie (filaments_and_vessel.mp4) corresponds to Figure 7 and shows possible interaction between a filament and coronary vessels in the left ventricular wall. [file 720575.f1.zip]

Archive with 3 entries (2 files):
- 720575.f1/
- 720575.f1/apex_RV_filament.mp4
- 720575.f1/filaments_and_vessel.mp4
